# Supplementary material
Source: PubMed Central journal article supplement (PMC7598090)
Supplement: jci-130-138540-s093.pdf [file jci-130-138540-s093.pdf]

## **DNA damage and growth hormone hypersecretion in pituitary somatotroph adenomas**

Anat Ben-Shlomo, Nan Deng, Evelyn Ding, Masaaki Yamamoto, Adam Mamelak,

Vera Chesnokova, Artak Labadzhyan, Shlomo Melmed

### **Supplemental Information**

Table S1 – Table S3

Figure S1 – Figure S12

**Table S1.** Genes with sgSCNA processed by KEGG pathway analysis.

|          |           |          |         |         |        |           |         |         |          |          |           |           |         |
|----------|-----------|----------|---------|---------|--------|-----------|---------|---------|----------|----------|-----------|-----------|---------|
| AATK     | B3GALT2   | CCDC181  | DIEXF   | FCRL4   | GRIN3A | KCTD5     | MIA3    | NWD2    | PRR12    | SH3TC1   | TANC2     | UHRF1BP1L | ZNF264  |
| ABCA13   | B3GALT6   | CCDC190  | DIP2B   | FEM1B   | GRIN3B | KDM5B     | MICAL3  | ORM1    | PRR14L   | SHB      | TARBP1    | UIMC1     | ZNF267  |
| ABCB1    | BARD1     | CCDC66   | DLGAP5  | FER1L6  | GRK7   | KIAA0232  | MIOS    | OTUD7A  | PRR16    | SHH      | TAS2R3    | UPK3B     | ZNF283  |
| ACE      | BAZ2B     | CCR2     | DLX6    | FEV     | HADHA  | KIAA0430  | MKI67   | P2RY14  | PRR18    | SHISA7   | TAS2R39   | UPP2      | ZNF287  |
| ACIN1    | BBS10     | CCSER1   | DMRTA1  | FGD6    | HAS2   | KIAA0753  | MKKS    | PAIP1   | PRRT4    | SIK1     | TAS2R60   | URAD      | ZNF292  |
| ACP6     | BBS7      | CCT7     | DMRTA2  | FGL2    | HCFC1  | KIAA1107  | MME     | PAPD5   | PRSS1    | SIPA1L2  | TBR1      | USF3      | ZNF304  |
| ACSBG2   | BBX       | CD163    | DMXL2   | FIGNL1  | HCFC2  | KIAA1109  | MON2    | PARP14  | PRSS16   | SIPA1L3  | TBX1      | USP34     | ZNF318  |
| ACSS1    | BCAS1     | CD163L1  | DOCK3   | FILIP1  | HCN4   | KIAA1210  | MS4A1   | PARP15  | PTGER1   | SIRPB1   | TBX2      | USP40     | ZNF326  |
| ADAMTS12 | BCL11A    | CD180    | DRD4    | FLG2    | HEATR6 | KIAA1551  | MTERF1  | PARP2   | PTK2     | SIX4     | TCHHL1    | USP53     | ZNF334  |
| ADAMTSL2 | BCLAF1    | CD1C     | DSE     | FLT4    | HECTD1 | KIF2B     | MUM1L1  | PARP8   | PTPRJ    | SKIDA1   | TDP1      | USPL1     | ZNF343  |
| ADARB2   | BCR       | CDH19    | DST     | FMN2    | HECTD3 | KIF3A     | MUT     | PARP9   | PTPRZ1   | SLC12A6  | TDRD6     | UTS2R     | ZNF347  |
| ADCY10   | BDP1      | CDH22    | DTL     | FNIP1   | HELB   | KIR3DL2   | MXRA8   | PARVA   | PTRF     | SLC15A4  | TET2      | VCAN      | ZNF354B |
| ADGR1    | BEGAIN    | CDHR2    | DUSP5   | FOXC1   | HELZ   | KLHL35    | MYCN    | PAXBP1  | PUS3     | SLC16A12 | TEX15     | VEGFA     | ZNF354C |
| ADGR2    | BEND4     | CDK13    | DYTN    | FOXC2   | HERC1  | KLK9      | MYH1    | PCDH15  | PUS7L    | SLC22A25 | TGS1      | VPS13C    | ZNF396  |
| AFDN     | BFSP1     | CDKN2AIP | EBF3    | FOXL2   | HES1   | KMT2A     | MYH2    | PCDH18  | PYGO1    | SLC26A2  | THAP9     | VWC2L     | ZNF416  |
| AFF2     | BHLHA9    | CEBPA    | EDA     | FOXQ1   | HGFAC  | KNL1      | MYH4    | PCDH9   | QSER1    | SLC2A12  | THBD      | WAPL      | ZNF440  |
| AGMAT    | BHLHB9    | CEBPD    | EDNRA   | FPR3    | HIC1   | KRT26     | MYH8    | PCDHA10 | R3HCC1L  | SLC30A1  | THNSL1    | WDR33     | ZNF451  |
| AGRN     | BHLHE41   | CEBPZ    | EFL1    | FRAS1   | HIVEP1 | KRT33B    | MYO16   | PCDH6   | RAB3GAP1 | SLC30A10 | THR8      | WDR7      | ZNF454  |
| AGTR1    | BHMT2     | CECR6    | EID2    | FREM2   | HIVEP2 | KRT34     | MYO9A   | PCDHAC1 | RAB3IP   | SLC35E1  | TIGD4     | WDR89     | ZNF471  |
| AHDC1    | BICD1     | CEL      | EIF4G3  | FUCA2   | HMCN1  | KRT7      | N4BP2   | PCDHB16 | RAG2     | SLC39A6  | TIGD6     | WHSC1L1   | ZNF483  |
| AHR      | BLOC153   | CELA3A   | ELFN2   | FUT4    | HMGXB3 | KRT77     | NANOS1  | PCDHB5  | RALGAPB  | SLC8A2   | TLR10     | WNK1      | ZNF484  |
| AKAP13   | BMP2      | CENPF    | EMX2    | FUT9    | HMX1   | KRTAP10-6 | NANP    | PCDHGA4 | RANBP2   | SLC9A5   | TLR2      | WNK3      | ZNF497  |
| AKAP14   | BMP2K     | CEP152   | EN2     | FZD3    | HS6ST3 | LAMA5     | NAPRT   | PCDHGA6 | RAPGEF2  | SLCO1B3  | TLR5      | XIRP2     | ZNF510  |
| AKAP3    | BOD1L1    | CEP170B  | ENAM    | GAB1    | HSPA4L | LCOR      | NAT1    | PDCD2   | RAPH1    | SLFN14   | TMCC1     | XPO1      | ZNF514  |
| AKAP6    | BRCA1     | CEP250   | ENDOD1  | GABPA   | HYAL4  | LEMD2     | NAV3    | PDGFRA  | RBK      | SLK      | TMEM121   | XRN2      | ZNF518B |
| AKAP9    | BRCA2     | CEP295   | ERBB3   | GABRA6  | ID4    | LENG9     | NCALD   | PDIK1L  | RBMXL3   | SMC1B    | TMEM132D  | YOD1      | ZNF529  |
| ALDH5A1  | BRD8      | CEP350   | ERBIN   | GABRB3  | IDUA   | LGR4      | NCKAP1L | PDZD8   | REL      | SMCHD1   | TMEM133   | YY1       | ZNF534  |
| ALMS1    | BRWD1     | CFHR3    | ERC2    | GAL3ST3 | IFFO2  | LGSN      | NCKAP5L | PDZRN4  | REV3L    | SMG1     | TMEM158   | ZAR1      | ZNF544  |
| ALS2CR11 | BTBD1     | CHD2     | ERCC4   | GALM    | IFI16  | LHCGR     | NCOA1   | PEG3    | RGAG1    | SNED1    | TMEM178A  | ZBED6     | ZNF546  |
| ALYREF   | BTBD11    | CHML     | ERCC6   | GALR3   | IFIT2  | LIG4      | NES     | PEX1    | RLF      | SOBP     | TMEM64    | ZBTB49    | ZNF549  |
| AMER2    | BTN3A1    | CHRNA7   | ERCC6L2 | GAPVD1  | IFNA5  | LILRA6    | NEURL1  | PGP     | RLIM     | SOCS4    | TMEM99    | ZCCHC6    | ZNF550  |
| AMH      | C10orf12  | CHST13   | ERMAP   | GAREM2  | IGFL3  | LILRB2    | NEUROG2 | PHF14   | RLN2     | SOD3     | TMPO      | ZDBF2     | ZNF569  |
| ANGPTL1  | C14orf177 | CHSY3    | ERRF1   | GCC2    | IGSF10 | LILRB5    | NFIA    | PHF3    | RMI1     | SOGA3    | TNFAIP3   | ZEB2      | ZNF573  |
| ANK3     | C17orf96  | CIC      | ERVV-1  | GCNT1   | IL1RAP | LIPG      | NFIB    | PHIP    | RNASE11  | SORBS2   | TNFRSF11B | ZFH4      | ZNF583  |
| ANKRD1   | C18orf63  | CLCNKA   | EXD3    | GGN     | IL6ST  | LOR       | NIPBL   | PHLPP1  | RNF139   | SOWAHB   | TNRC18    | ZFP1      | ZNF585A |
| ANKRD11  | C1QL1     | CLCNKB   | EXPH5   | GIMAP2  | INPP5F | LRBA      | NKRF    | PIGM    | RNF150   | SOX1     | TOPORS    | ZFP28     | ZNF587  |
| ANKRD17  | C1QTNF4   | CLDN17   | F11     | GIMAP8  | INSM1  | LRFN1     | NKTR    | PIK3R1  | RNF6     | SOX11    | TOR4A     | ZFP36L2   | ZNF596  |

**Table S2.** Characteristics of 40 pituitary adenomas included in Western blot and qRT-PCR analysis.

|                              |                            |                 | Gonadotroph & null<br>cell (n=16) | Somatotroph<br>(n=15)  | Lactotroph<br>(n=9)    |           |
|------------------------------|----------------------------|-----------------|-----------------------------------|------------------------|------------------------|-----------|
| Age, mean ± SD [range]       |                            |                 | 47.9 ± 17.5<br>[25-77]            | 44.8 ± 12.4<br>[17-64] | 45.0 ± 16.9<br>[23-70] |           |
| Sex, n (%)                   | Females                    |                 | 4 (25.0)                          | 7 (46.6)               | 3 (33.3)               |           |
|                              | Males                      |                 | 12 (75.0)                         | 8 (53.3)               | 6 (66.7)               |           |
| IHC                          | Hormones, n (%)            | FSH             | 14 (80.0)                         | 2 (13.3)               | 0                      |           |
|                              |                            | LH              | 6 (37.5)                          | 1 (6.7)                | 0                      |           |
|                              |                            | αGSU            | 12 (75.0)                         | 7 (46.7)               | 1 (11)                 |           |
|                              |                            | ACTH            | 1 (6.3)                           | 3 (20.0)               | 1 (11)                 |           |
|                              |                            | PRL             | 0                                 | 11 (73.3)              | 9 (100)                |           |
|                              |                            | GH              | 0                                 | 15 (100)               | 0                      |           |
|                              |                            | TSH             | 1 (6.3)                           | 4 (26.7)               | 0                      |           |
|                              |                            | Ki67, % cells   | Mean ± SD                         | 1.4 ± 0.8              | 1.1 ± 0.8              | 2.2 ± 1.6 |
|                              |                            |                 | Median                            | 2                      | 1                      | 2.0       |
|                              |                            |                 | ≥ 3 %                             | 0                      | 2                      | 3         |
| MRI                          | Largest tumor diameter, mm | Mean ± SD       | 27.3 ± 11.4                       | 14.5 ± 8.3             | 21.7 ± 11.3            |           |
|                              |                            | Median          | 26.0                              | 12.5                   | 21                     |           |
|                              |                            | Range           | 11-59                             | 2.5-30                 | 6-44                   |           |
|                              | Adenoma extension, n (%)   | Cavernous sinus | 11 (68.8)                         | 5 (33.3)               | 5 (55.6)               |           |
|                              |                            | Suprasellar     | 15 (93.8)                         | 8 (53.3)               | 3 (33.3)               |           |
|                              |                            | Sphenoid sinus  | 3 (18.8)                          | 4 (26.7)               | 2 (22.2)               |           |
| Pre-surgery treatment, n (%) | Dopamine agonist           | 3 (18.8)        | 0                                 | 9 (100.0)              |                        |           |
|                              | Irradiation                | 0               | 0                                 | 0                      |                        |           |

IHC, immunohistochemistry

**Table S3.** Antibodies used in Western blot analysis.

| Antibody                        | Company        | Catalogue number | Reactivity* | Clonality  |
|---------------------------------|----------------|------------------|-------------|------------|
| p53                             | R&D systems    | AF1355           | H           | Polyclonal |
| p21 <sup>Wif1/Cip1</sup>        | Cell Signaling | 2947             | H           | Monoclonal |
| $\gamma$ H2AX <sup>Ser139</sup> | Cell Signaling | 9718             | H, M        | Monoclonal |
| H2AX                            | R&D systems    | MAB3406          | H, M        | Monoclonal |

\*Relevant to this study. H, human; M, mouse

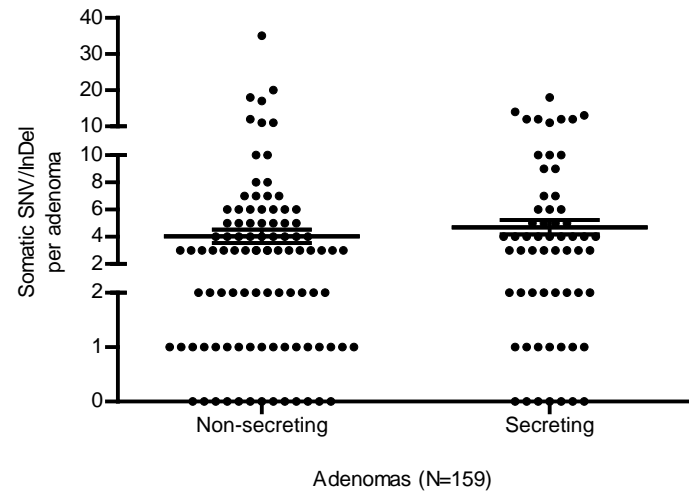

**Figure S1.** Number of somatic SNV/InDel per adenoma assessed by WES in non-secreting (gonadotroph, null cell, and silent corticotroph; n=98) compared with secreting (corticotroph, lactotroph, and somatotroph; n=61) adenomas.

### Whole Exome Sequencing (WES)

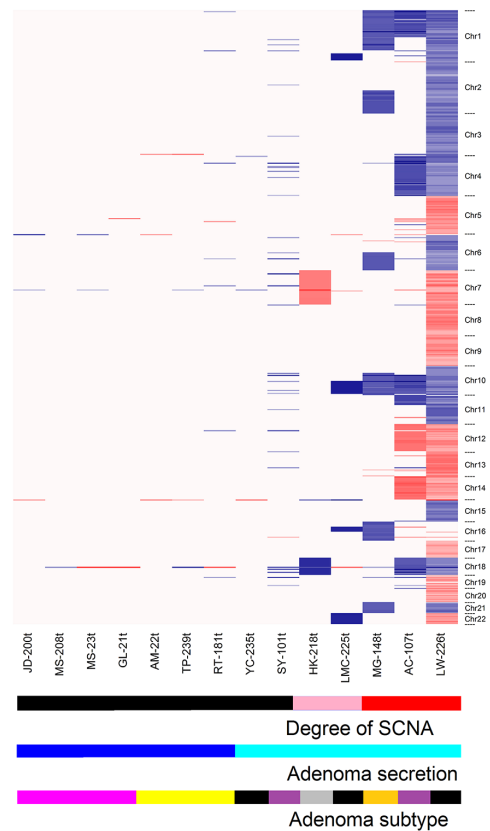

### Whole Genome Sequencing (WGS)

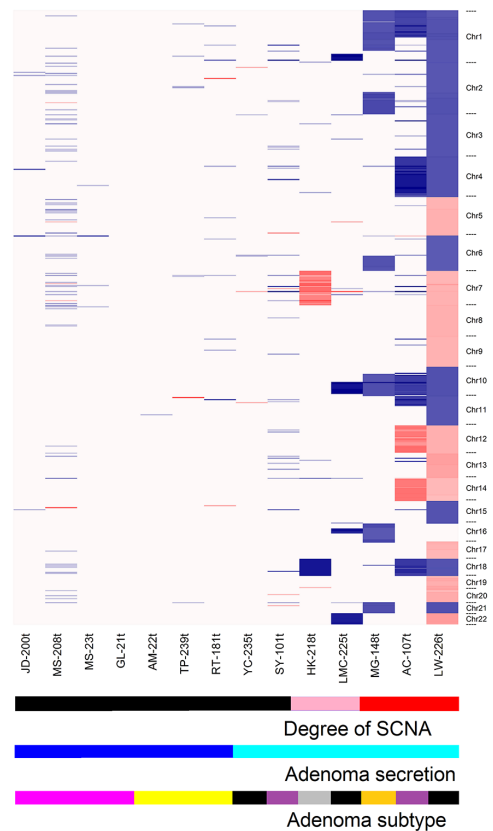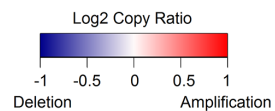

#### Degree of SCNA

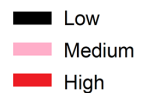

#### Adenoma secretion

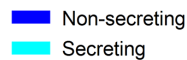

#### Adenoma subtype

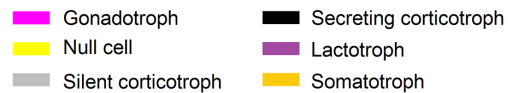

**Figure S2.** Heatmap of SCNA in 14 pituitary adenomas analyzed by WES and WGS depicting SCNA copy ratio, adenoma functional secretory status, and subtype.

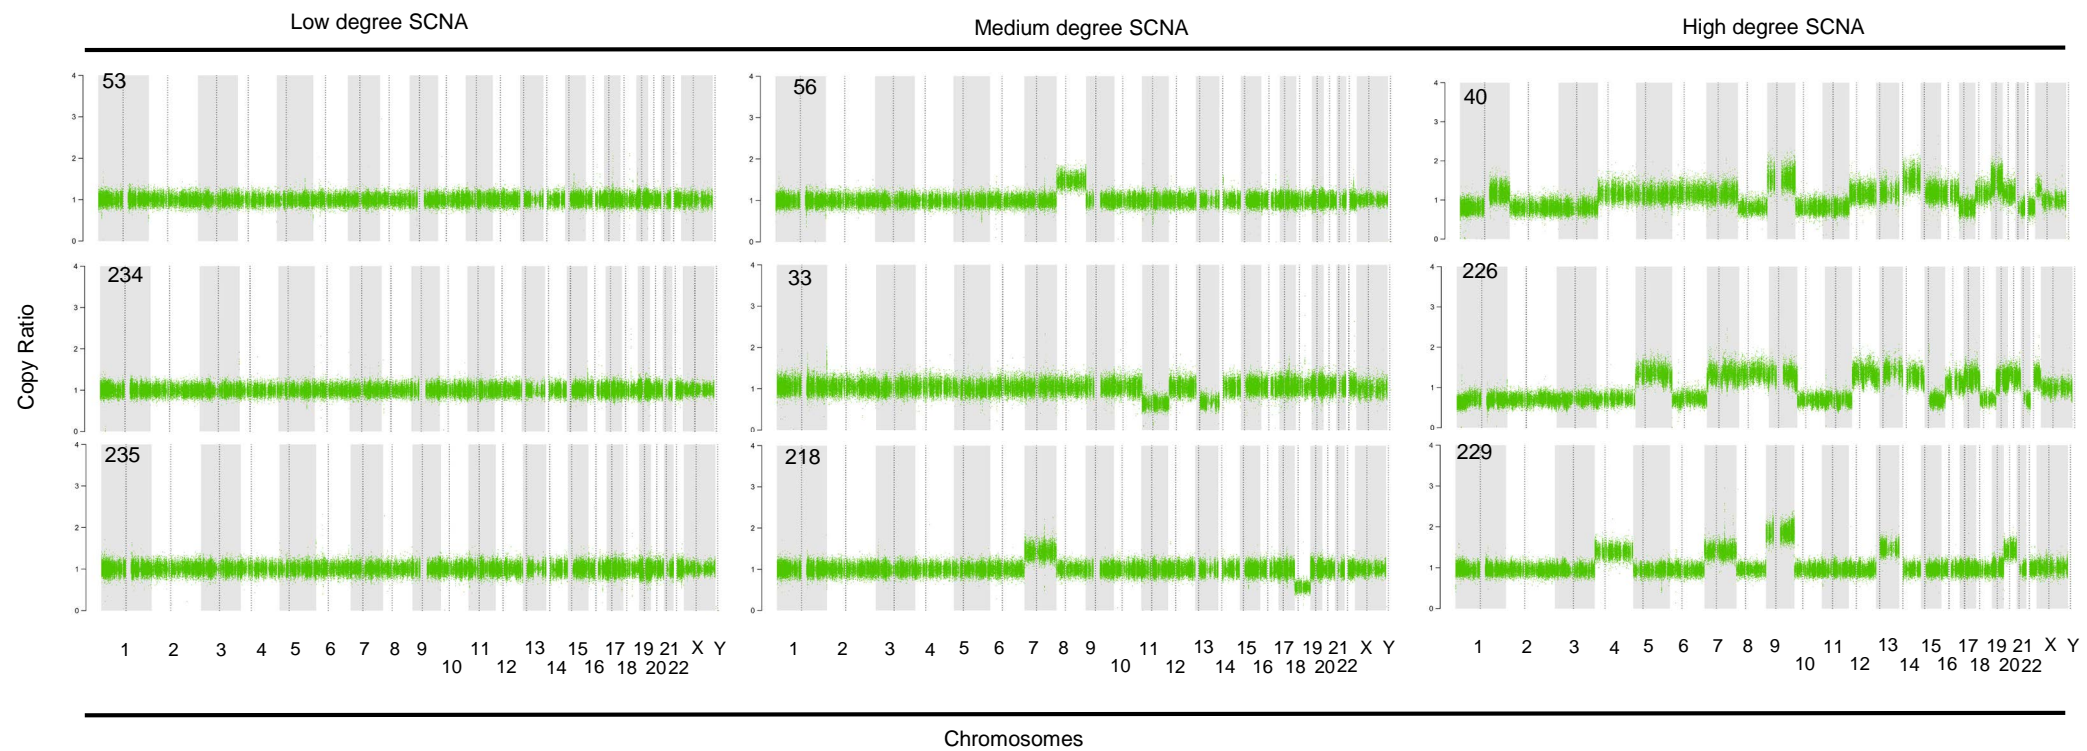

**Figure S3.** Visual representation of low, medium, and high degree SCNA in 9 human pituitary adenomas. Copy ratio is shown on the y-axis and chromosome number on the x-axis; adenoma number is presented in the left upper corner of each graph.

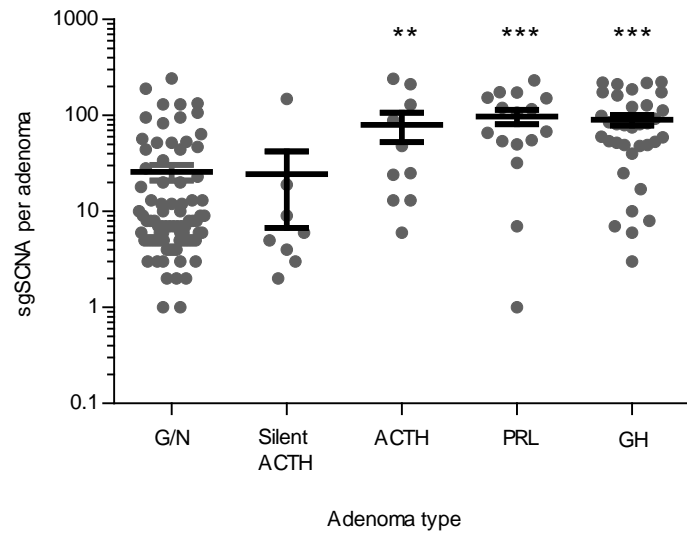

**Figure S4.** Number of sgSCNA per adenoma for each adenoma subtype in the entire cohort (n=159). G/N, non-secreting gonadotroph/null cell adenomas, Silent ACTH, silent corticotroph adenomas; ACTH, secreting corticotroph adenomas; PRL, lactotroph adenomas; GH, somatotroph adenomas. Results presented as number of sgSCNA per adenoma, 2-tailed unpaired t test with Bonferroni correction. \*\*,  $p \leq 0.01$  vs G/N, \*\*\*,  $p \leq 0.001$  vs G/N.



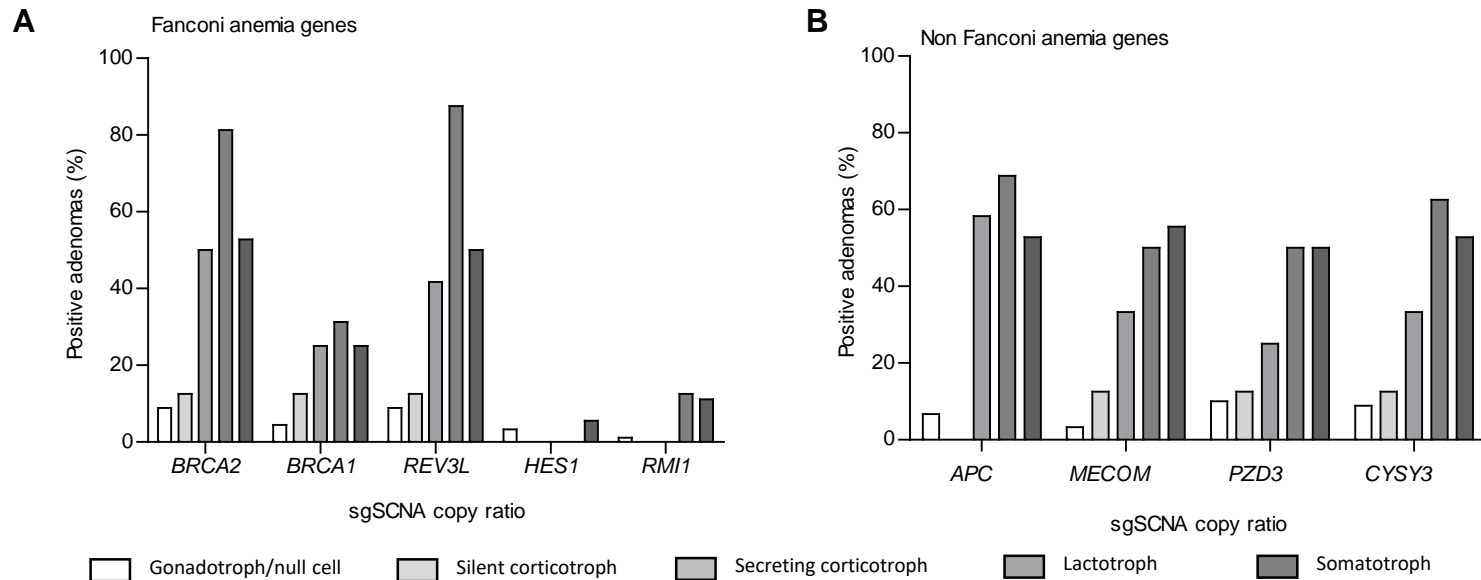

**Figure S5.** Frequently occurring sgSCNA genes identified in pituitary adenomas by KEGG pathway analysis. (A-B) Percent of adenomas expressing sgSCNA by adenoma subtype identified in (A) Fanconi anemia pathway (*BRCA2*, *BRCA1*, *REV3L*, *HES1*, and *RMI1*) and (B) pathways other than Fanconi anemia, specifically *APC* (basal cell carcinoma pathway, hsa05217), *MECOM* and *PZD3* (pathways in cancer, hsa05200), and *CYSY3* (glycosaminoglycan biosynthesis-chondroitin sulfate/dermatan sulfate pathway, hsa00532). (C-D) Correlations between adenoma SCNA copy ratio and (C) Fanconi anemia pathway sgSCNA copy ratio (Pearson  $r$  -0.24,  $p=0.006$ ) and (D) non-Fanconi anemia pathway sgSCNA score (Pearson  $r$  -0.05,  $p=0.51$ ). (E) sgSCNA associated genes in the cAMP pathway identified by KEGG by adenoma type. n, number sgSCNA per adenoma type, One way ANOVA with Bonferroni correction  $p=0.0008$  for somatotroph adenomas vs other adenoma types.

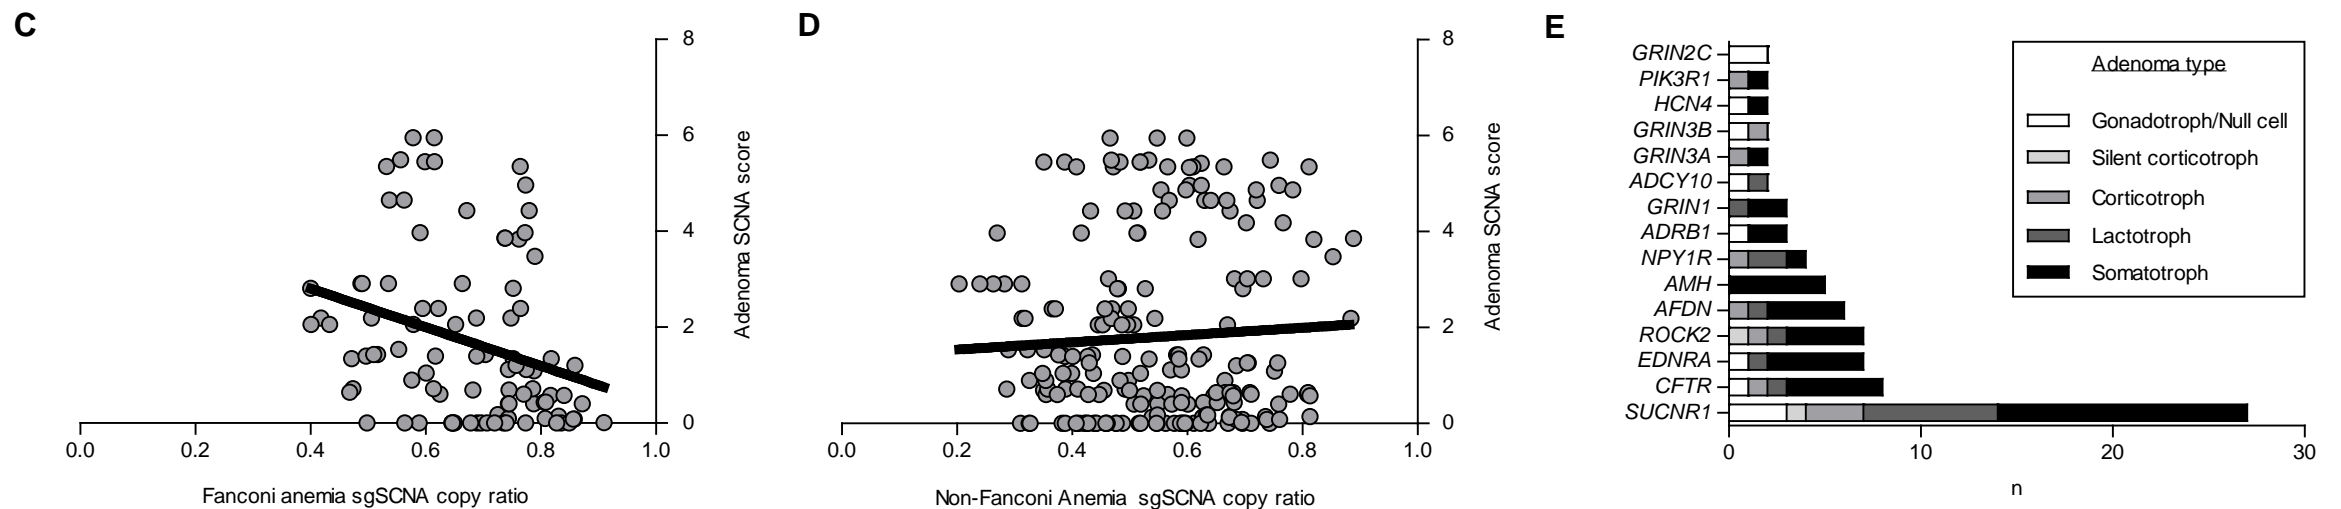

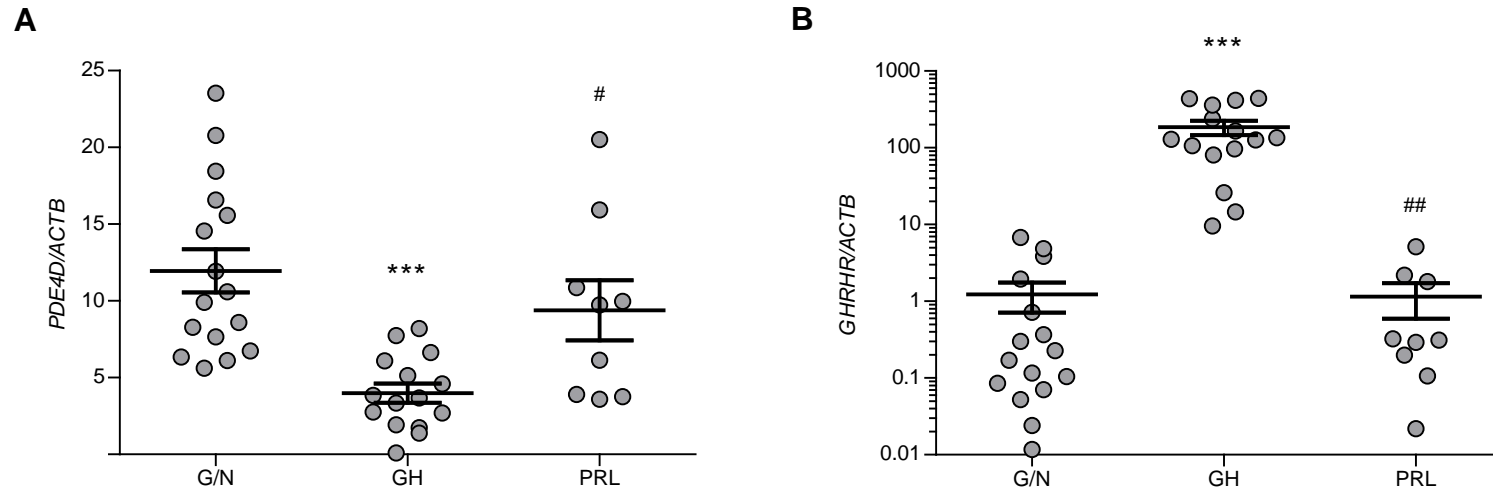

**Figure S6.** (A) Human *PDE4D* and (B) *GHRHR* mRNA expression in gonadotroph/null cell (G/N), somatotroph (GH), and lactotroph (PRL) pituitary adenomas normalized to  $\beta$  actin mRNA levels (*ACTB*). Results presented as mean  $\pm$  SEM, 2-tailed unpaired t test with Bonferroni correction. \*\*\*  $p \leq 0.001$  vs G/N; #  $p \leq 0.05$  vs GH; ##,  $p \leq 0.01$  vs GH.

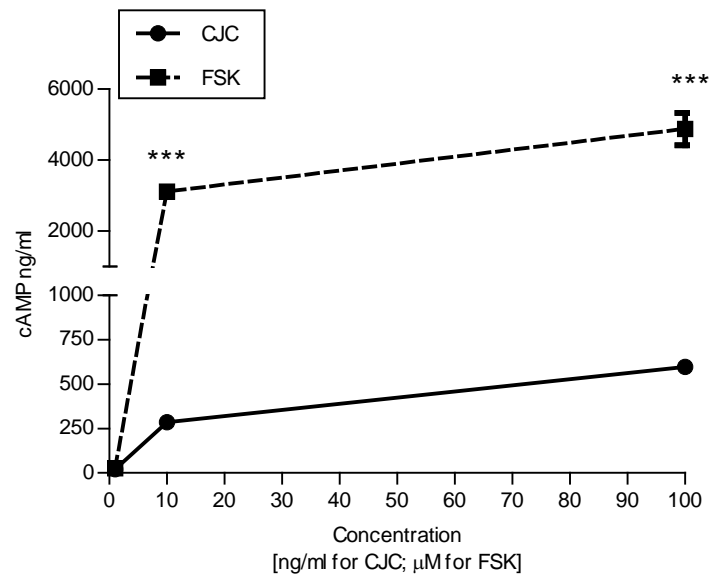

**Figure S7.** Dose-dependent cAMP response of normal primary pituitary cultures to 30 minutes treatment with either forskolin (FSK,  $\mu\text{M}$ ) or CJC-1295 (CJC, ng/mL). Two-way ANOVA with Bonferroni correction. \*\*\*,  $p \leq 0.001$  FSK vs CJC.

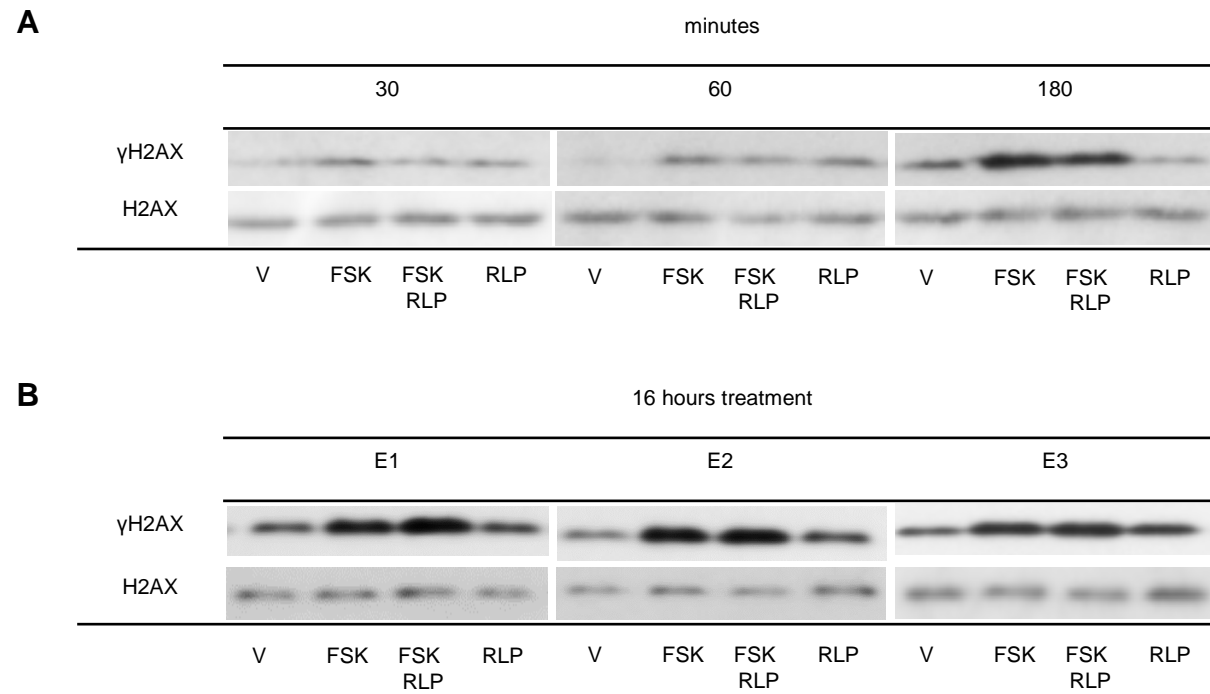

**Figure S8.** Normal mouse primary pituitary cultures treated with forskolin (FSK) and rolipram (RLP). (A) Western blot depicting  $\gamma$ H2AX expression at 30, 60, and 180 minutes after treatment with vehicle (V), 10  $\mu$ M FSK, co-treatment of 10  $\mu$ M FSK and 1  $\mu$ M RLP, or 1  $\mu$ M RLP alone. Total H2AX served as normalizing control. (B)  $\gamma$ H2AX expression after 16 hours treatment in 3 different experiments, E1, E2, and E3. Total H2AX served as normalizing control.

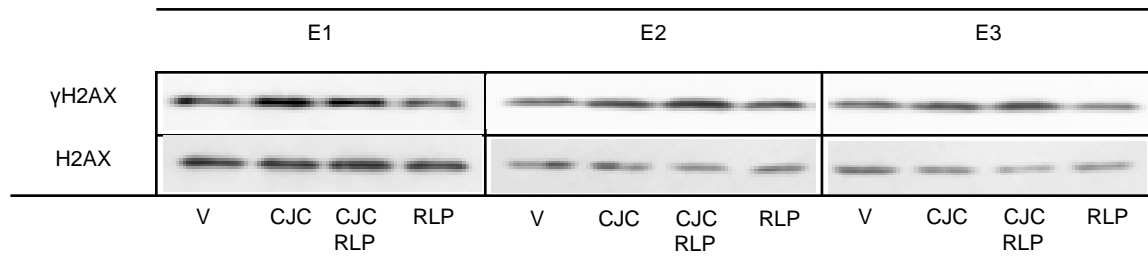

**Figure S9.** Normal mouse primary pituitary cultures treated with CJC-1295 (CJC) and rolipram (RLP).  $\gamma$ H2AX expression after 16 hours treatment with vehicle (V), 10 ng/mL CJC-1295 (CJC), co-treatment with 10 ng/mL CJC-1295 and 1  $\mu$ M rolipram (RLP), or with 1  $\mu$ M rolipram alone in 3 different experiments, E1, E2, and E3. Total H2AX served as normalizing control.

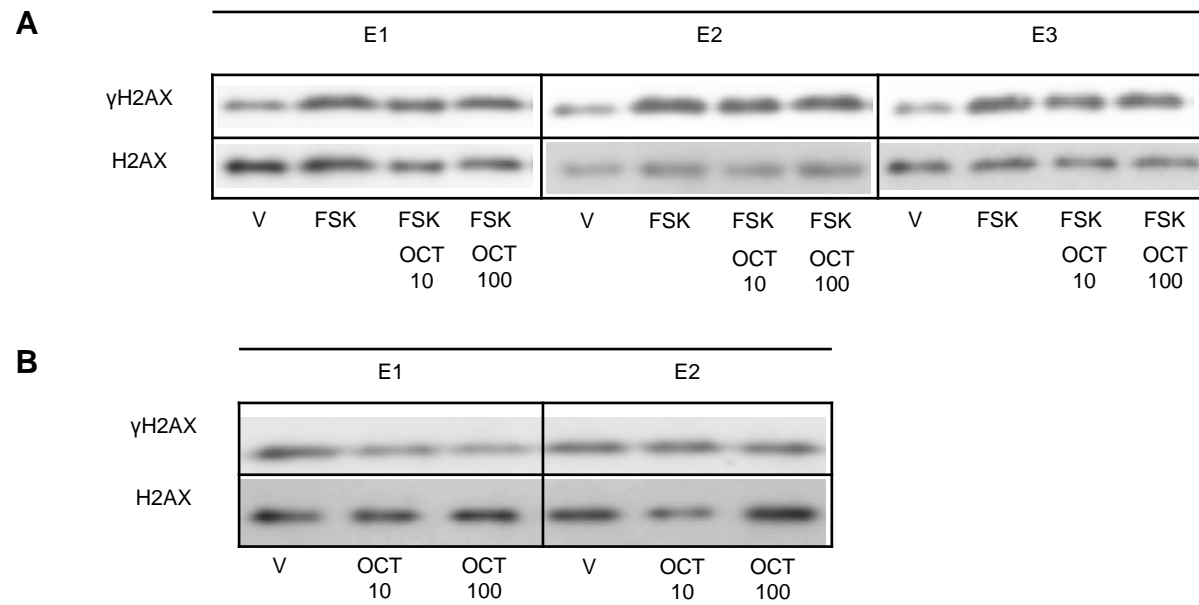

**Figure S10.** Normal mouse primary pituitary cultures treated with forskolin (FSK) and octreotide (OCT). (A)  $\gamma$ H2AX expression after 16 hours of treatment with vehicle (V), 10  $\mu$ M FSK, co-treatment with 10  $\mu$ M FSK and 10 nM OCT (OCT 10), or co-treatment with 10  $\mu$ M FSK and 100 nM OCT (OCT 100) in 3 different experiments, E1, E2, and E3. Total H2AX served as normalizing control. (B) Mouse primary pituitary cultures treated with OCT 10 and OCT 100.  $\gamma$ H2AX expression after 16 hours treatment with vehicle (V), OCT 10, and OCT 100 in 2 different experiments, E1 and E2. Total H2AX served as normalizing control.

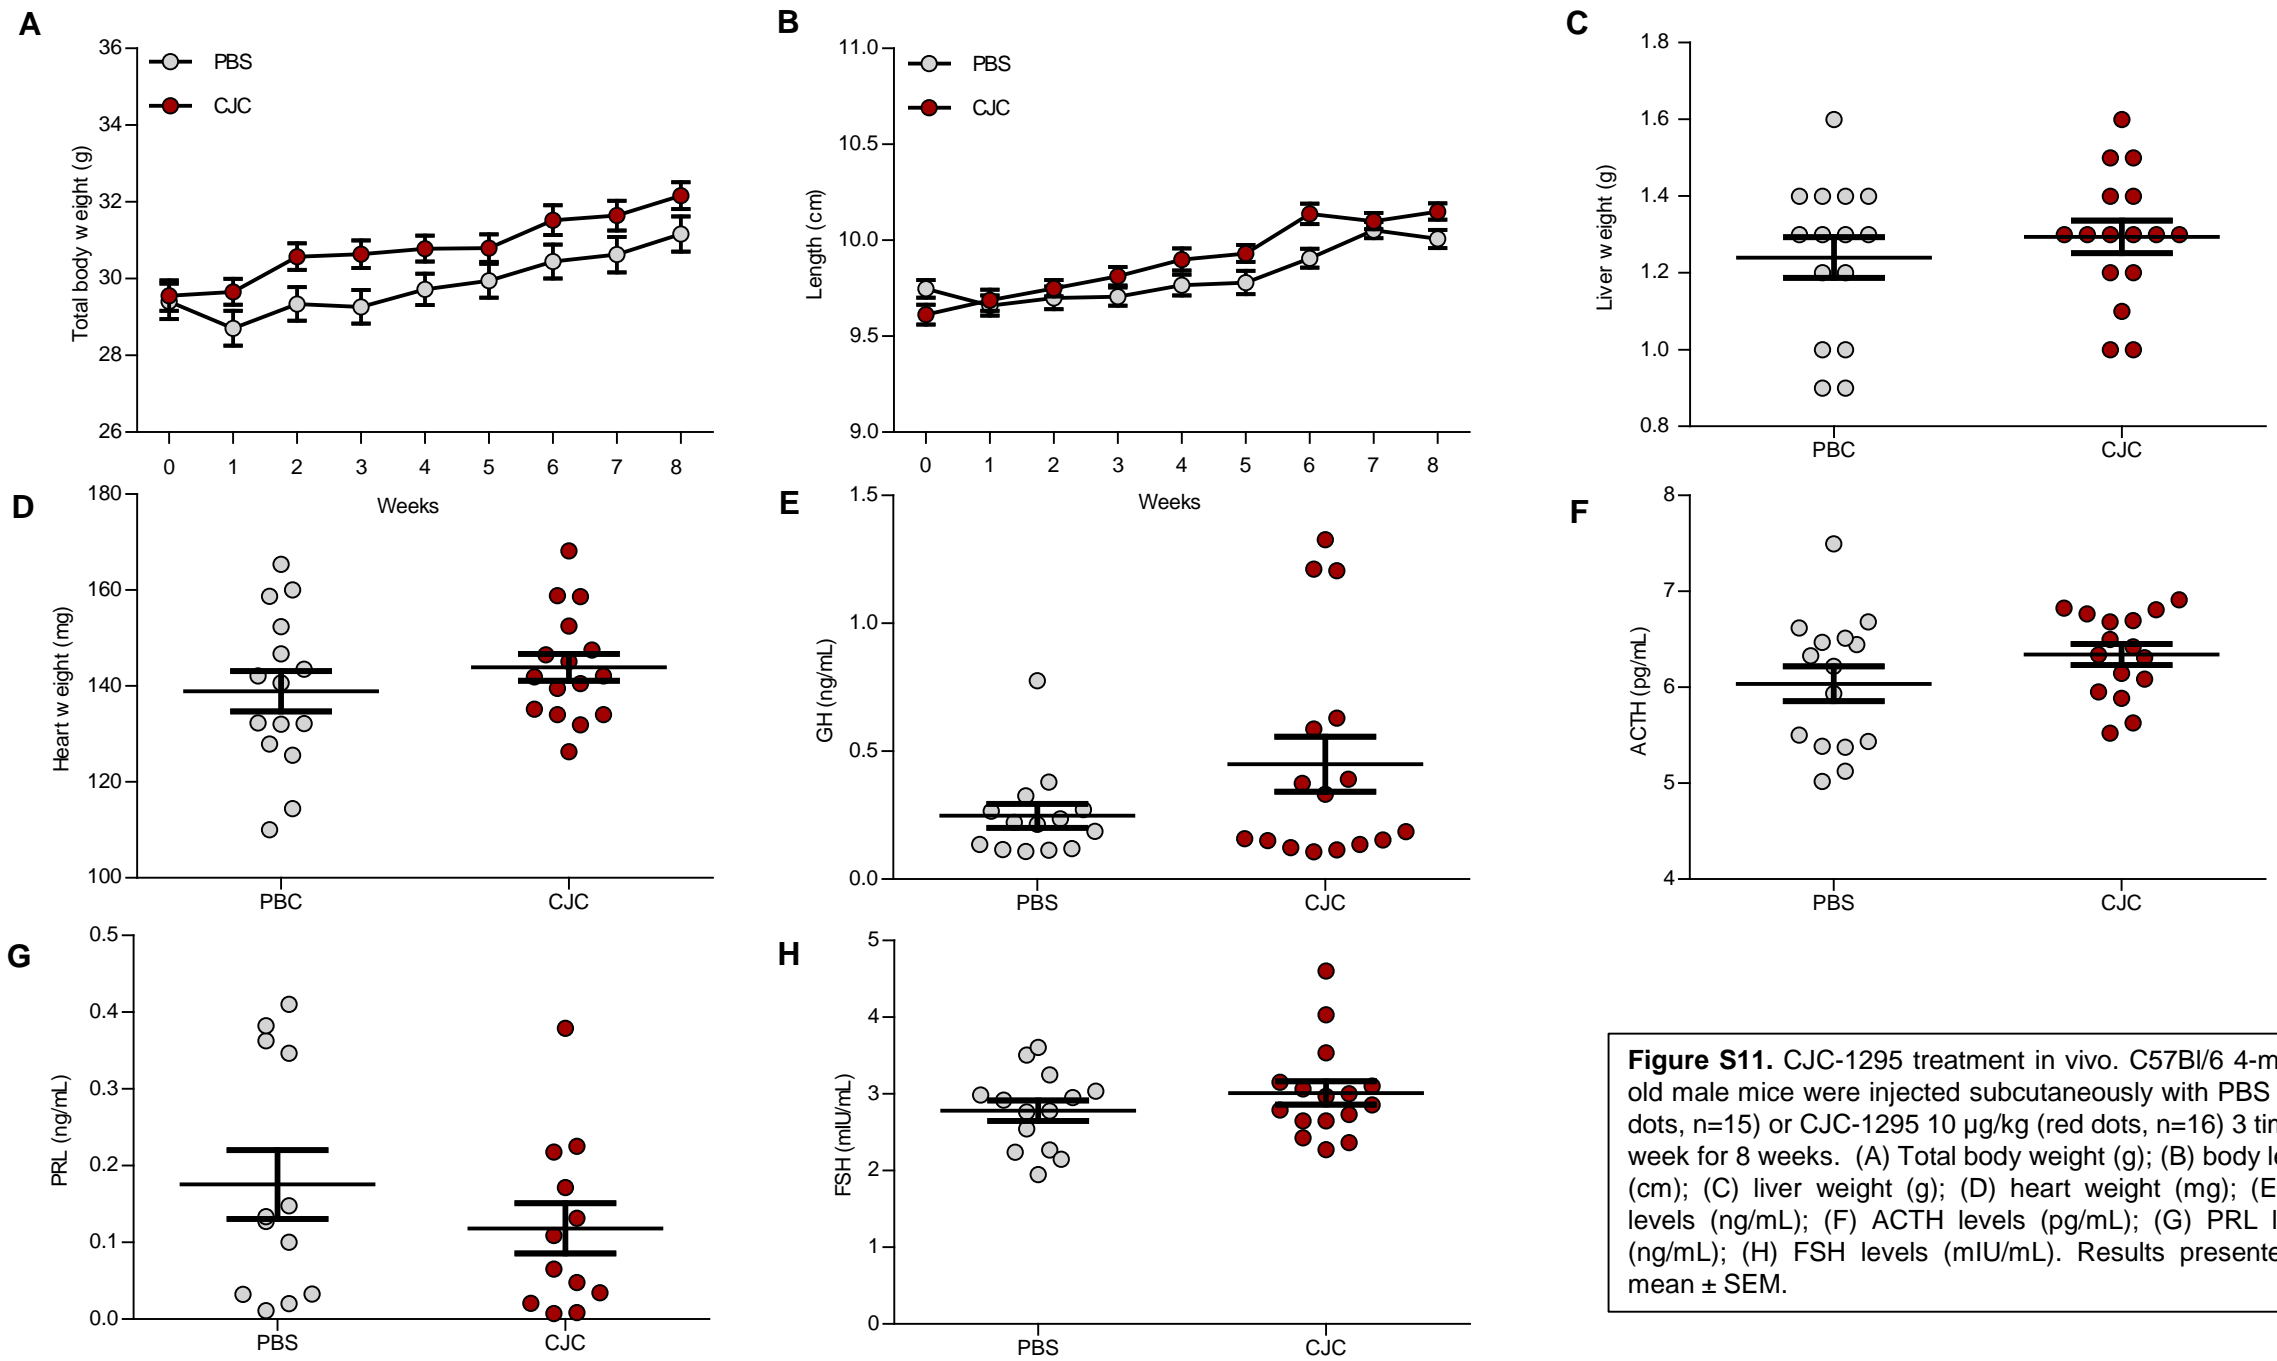

**Figure S11.** CJC-1295 treatment in vivo. C57Bl/6 4-month-old male mice were injected subcutaneously with PBS (gray dots, n=15) or CJC-1295 10  $\mu$ g/kg (red dots, n=16) 3 times a week for 8 weeks. (A) Total body weight (g); (B) body length (cm); (C) liver weight (g); (D) heart weight (mg); (E) GH levels (ng/mL); (F) ACTH levels (pg/mL); (G) PRL levels (ng/mL); (H) FSH levels (mIU/mL). Results presented as mean  $\pm$  SEM.

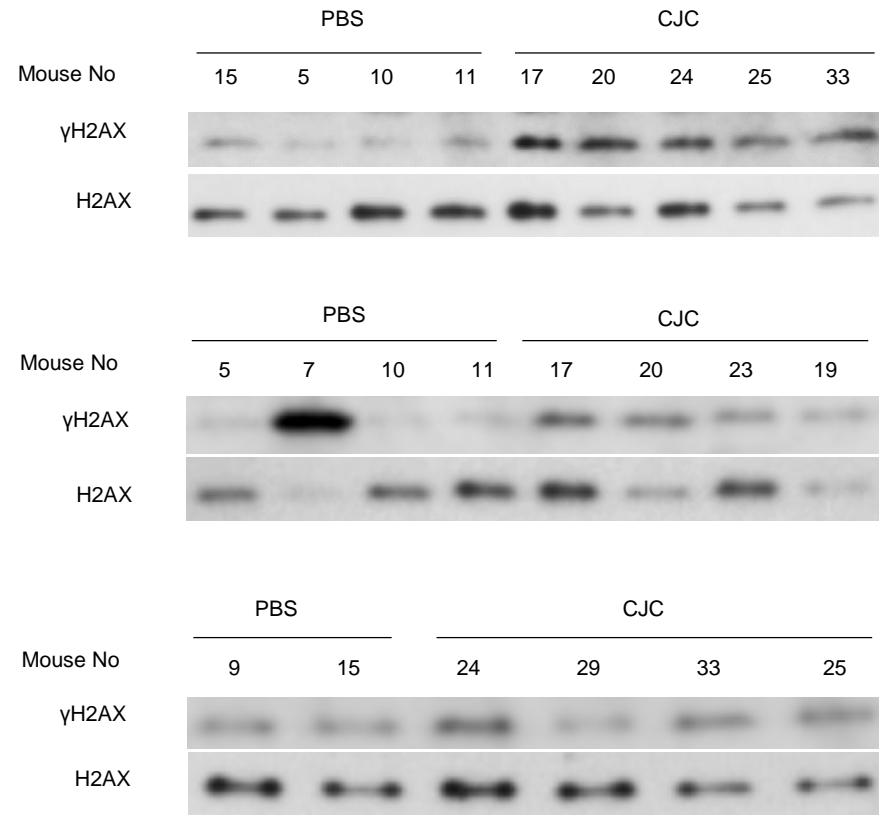

**Figure S12.** Western blot depicting  $\gamma$ H2AX change normalized to total H2AX of PBS (n=6) vs CJC-1295 (CJC, n=8) mice in vivo. Numbers represent mouse identification number. One mouse was excluded from the PBS group due to very low protein retrieval and the lack of a visible H2AX on Western blot. Mouse No 7 in the PBS group was excluded as an outlier, as described in Results.
